# Supplementary material for: Pregnane X receptor activation constrains mucosal NF-κB activity in active inflammatory bowel disease
Source: PLoS One. 2019 Oct 3;14(10):e0221924. doi: 10.1371/journal.pone.0221924 (PMC6776398; doi:10.1371/journal.pone.0221924)
Supplement: S4 Table — (XLS) [file pone.0221924.s009.xls]

## Sheet: Sheet1
Table S4 Patients information on biopsies
patient #	phenotype	biopt1	inflam?	biopt2	inflam?	biopt3	inflam?	biopt4	inflam?
1	crohn's disease	terminal ileum	no	bauhin valve	yes	colon transversum	no	colon descendens	no
2	crohn's disease	terminal ileum	yes	colon ascendens	yes	colon transversum	no	colon descendens	no
3	crohn's disease	colon transversum	no	colon descendens	no	none	no biopsy taken	none	no biopsy taken
4	ulcerative colitis	colon ascendens	yes	colon transversum	yes	colon descendens	yes	none	no biopsy taken
5	crohn's disease	terminal ileum	yes	terminal ileum	no	colon ascendens	no	colon descendens	no
6	ulcerative colitis	colon ascendens	yes	colon descendens	yes	none	no biopsy taken	none	no biopsy taken
7	crohn's disease	terminal ileum	no	colon ascendens	no	colon transversum	no	colon descendens	no
8	crohn's disease	terminal ileum	no	colon ascendens	yes	sigmoid	yes	none	no biopsy taken
9	ulcerative colitis	terminal ileum	no	colon ascendens	yes	colon descendens	yes	none	no biopsy taken
10	ulcerative colitis	colon ascendens	no	colon transversum	no	colon descendens	no	colon descendens	yes
11	crohn's disease	terminal ileum	no	colon ascendens	no	colon transversum	no	colon descendens	no
12	crohn's disease	terminal ileum	no	colon transversum	no	colon transversum	no	colon descendens	no
13	none	terminal ileum	no	colon ascendens	no	colon descendens	no	none	no biopsy taken
14	crohn's disease	terminal ileum	no	terminal ileum	yes	colon ascendens	yes	none	no biopsy taken
15	crohn's disease	colon descendens	no	sigmoid	no	sigmoid	yes	none	no biopsy taken
16	crohn's disease	terminal ileum	no	bauhin valve	yes	colon ascendens	no	colon transversum	no
17	crohn's disease	terminal ileum	no	bauhin valve	yes	colon ascendens	no	colon transversum	no
18	crohn's disease	terminal ileum	no	terminal ileum	yes	colon ascendens	no	colon transversum	no
19	crohn's disease	terminal ileum	no	colon ascendens	no	colon transversum	no	colon descendens	no
20	crohn's disease	sigmoid	yes	sigmoid	no	none	no biopsy taken	none	no biopsy taken
21	crohn's disease	colon transversum	no	colon descendens	no	none	no biopsy taken	none	no biopsy taken
22	crohn's disease	terminal ileum	no	bauhin valve	yes	colon transversum	no	none	no biopsy taken
23	crohn's disease	terminal ileum	yes	colon ascendens	no	colon descendens	no	none	no biopsy taken
24	ulcerative colitis	terminal ileum	no	colon ascendens	no	colon transversum	no	none	no biopsy taken
25	crohn's disease	colon ascendens	no	colon transversum	no	colon descendens	no	none	no biopsy taken
26	crohn's disease	colon transversum	no	sigmoid	no	none	no biopsy taken	none	no biopsy taken
27	ulcerative colitis	terminal ileum	no	colon ascendens	no	colon transversum	no	colon descendens	no
28	crohn's disease	colon transversum	no	colon descendens	no	sigmoid	no	none	no biopsy taken
29	none	terminal ileum	no	colon ascendens	no	colon transversum	no	colon descendens	no
30	crohn's disease	colon ascendens	no	colon transversum	no	colon descendens	no	sigmoid	no
31	none	terminal ileum	no	colon ascendens	no	colon ascendens	no	colon transversum	no
32	crohn's disease	terminal ileum	no	colon ascendens	no	colon transversum	no	colon descendens	no
33	none	terminal ileum	no	coecum	no	colon ascendens	no	colon descendens	no
34	none	terminal ileum	no	colon ascendens	no	colon transversum	no	none	no biopsy taken
35	none	coecum	no	colon transversum	no	sigmoid	no	none	no biopsy taken
36	ulcerative colitis	colon ascendens	no	colon transversum	no	colon descendens	no	none	no biopsy taken
37	crohn's disease	terminal ileum	no	terminal ileum	yes	colon transversum	no	colon descendens	no
38	crohn's disease	colon transversum	yes	colon transversum	no	none	no biopsy taken	none	no biopsy taken
39	none	terminal ileum	no	colon ascendens	no	none	no biopsy taken	none	no biopsy taken
40	none	colon ascendens	no	colon transversum	no	colon descendens	no	none	no biopsy taken
